# Supplementary material for: Comparison between 16S rRNA and shotgun sequencing in colorectal cancer, advanced colorectal lesions, and healthy human gut microbiota
Source: PubMed Central journal article supplement (PMC11285316; doi:10.1186/s12864-024-10621-7), 2024-07-29

**Additional Figure 2.** Heatmaps of the top 50 most abundant taxa (on average) shared by shotgun and 16S

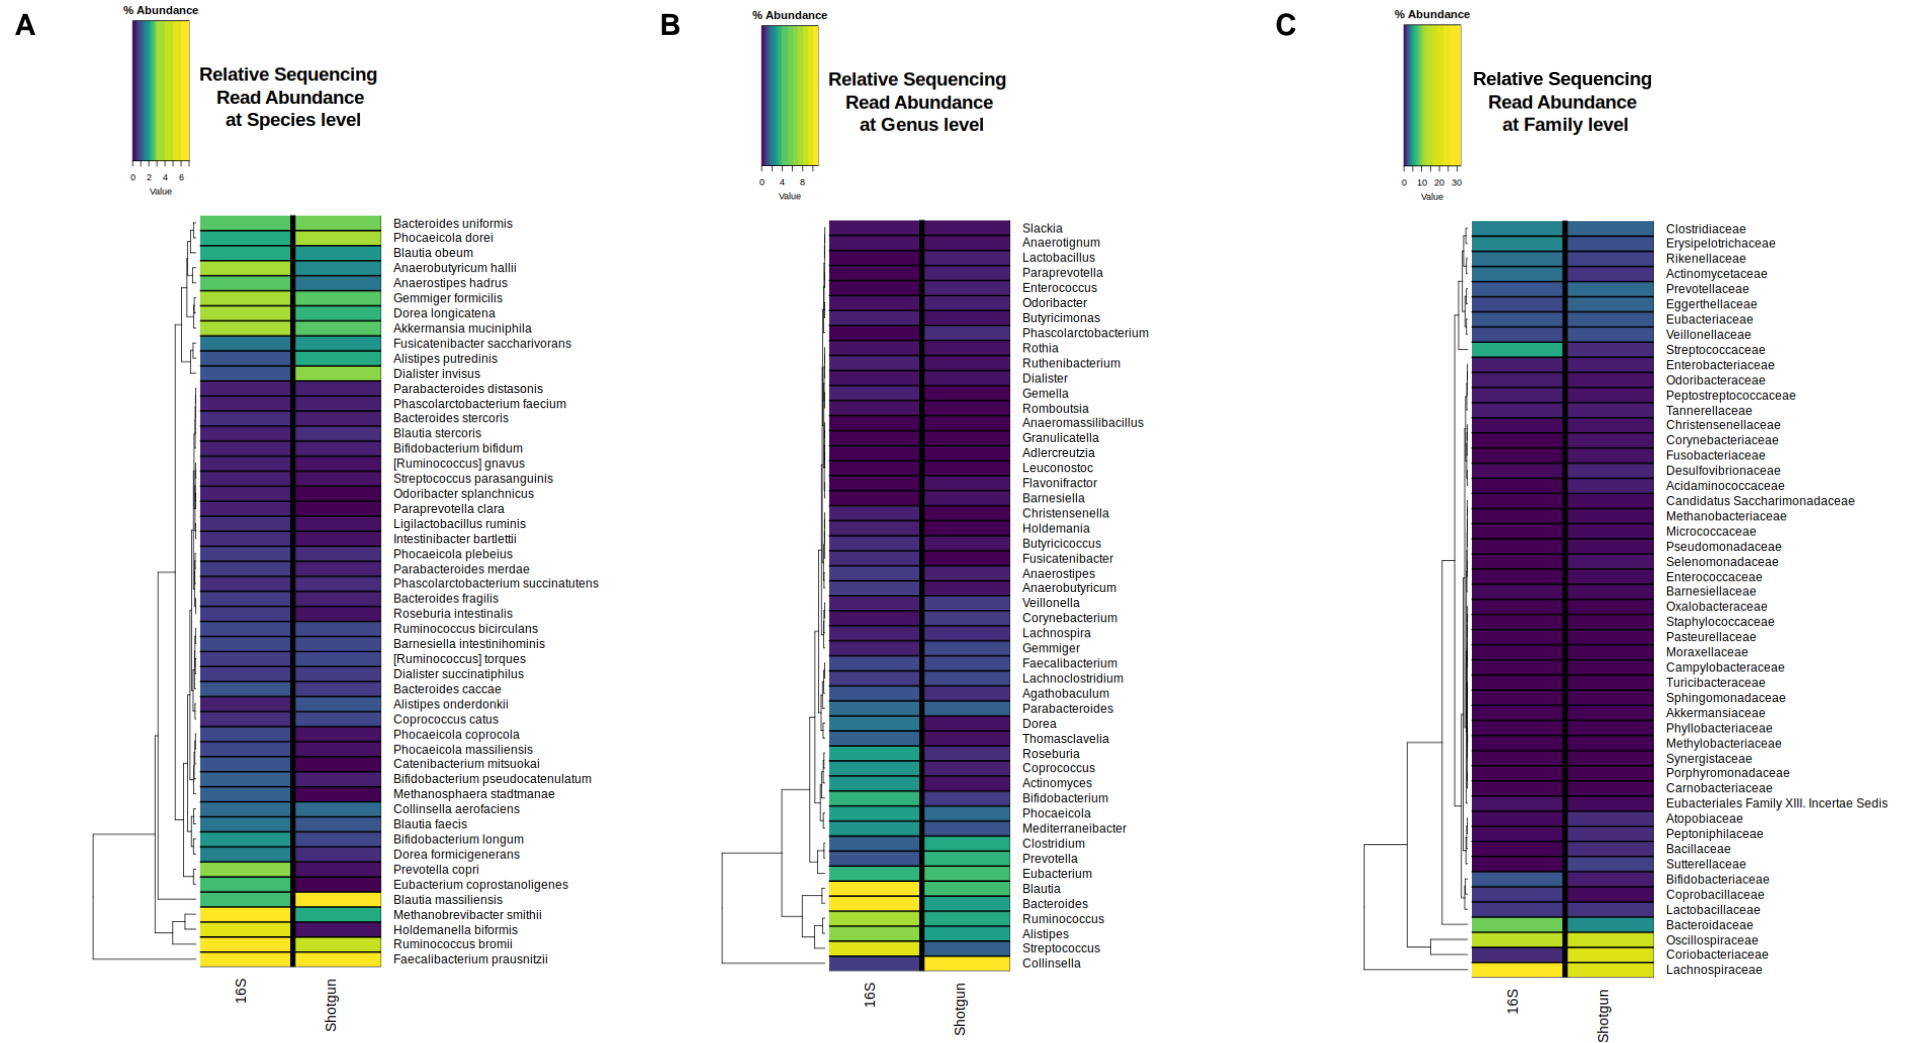

Supplement: 12864_2024_10621_MOESM2_ESM.pdf [file 12864_2024_10621_MOESM2_ESM.pdf]
