# Supplementary material for: Comparison between 16S rRNA and shotgun sequencing in colorectal cancer, advanced colorectal lesions, and healthy human gut microbiota
Source: PubMed Central journal article supplement (PMC11285316; doi:10.1186/s12864-024-10621-7), 2024-07-29

**Additional Figure S3.** Bar plots of the top 15 most common genera and families in 16S and shotgun abundance data. Each row represents a different sample with the same order in both plots

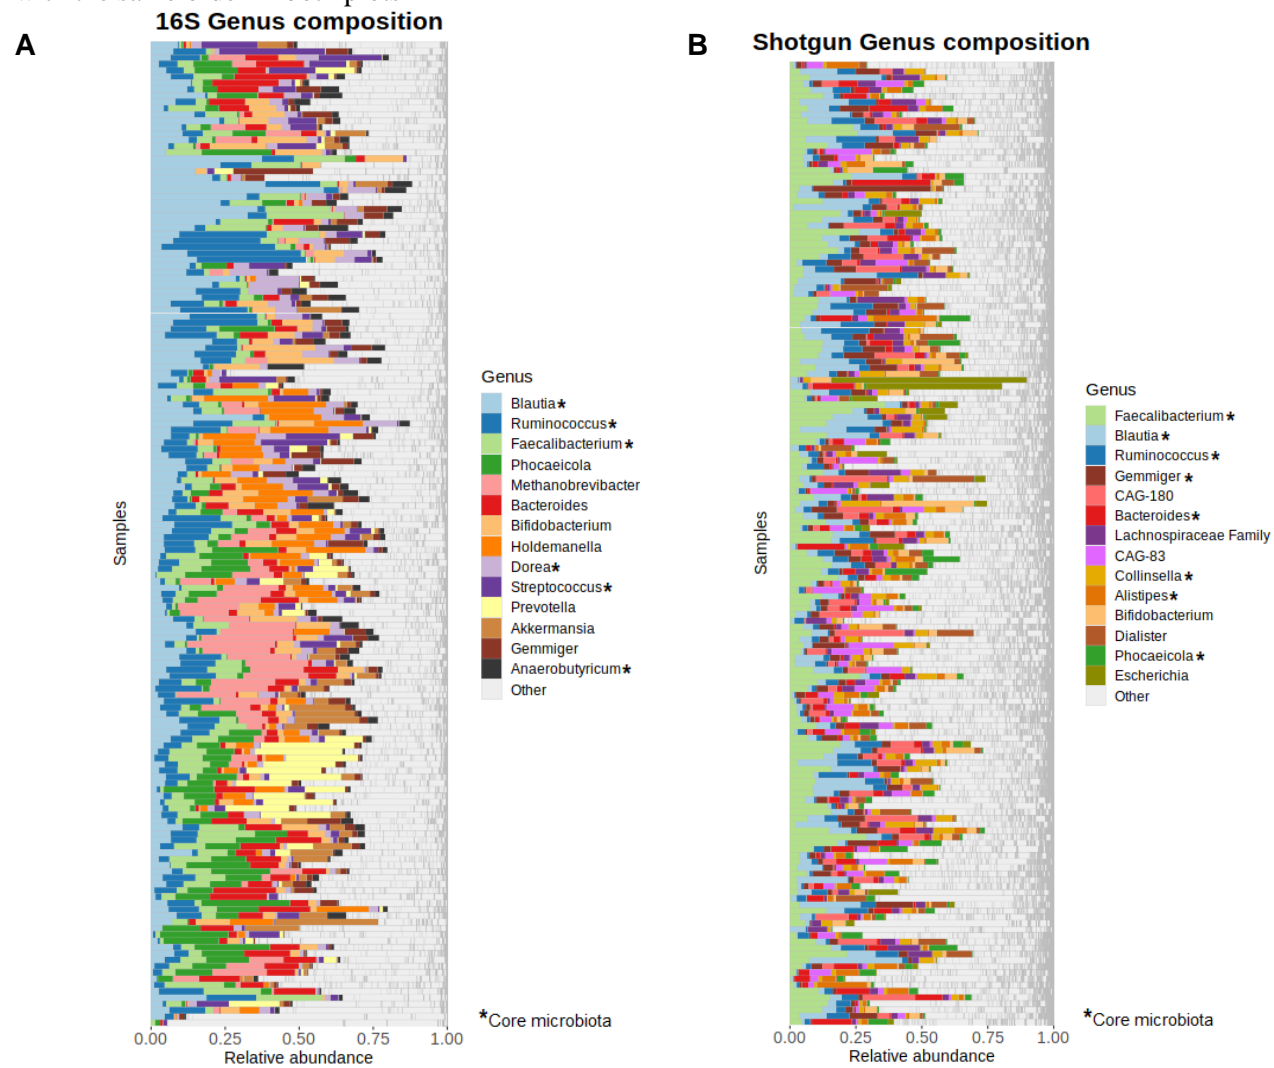

**C 16S Family composition**

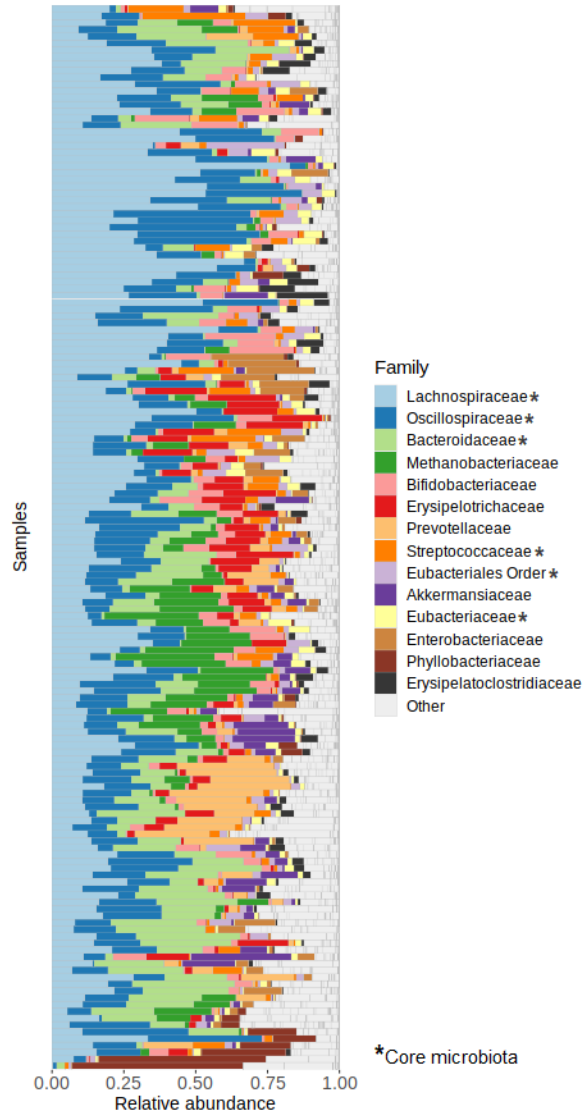

**D Shotgun Family composition**

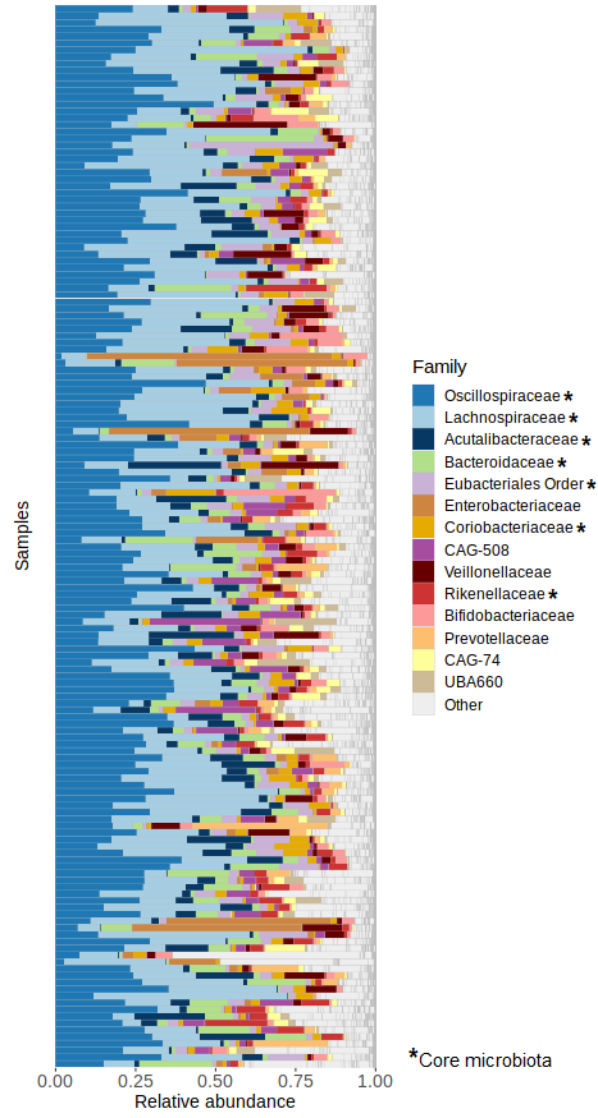

Supplement: 12864_2024_10621_MOESM3_ESM.pdf [file 12864_2024_10621_MOESM3_ESM.pdf]
