# Supplementary material for: Comparison between 16S rRNA and shotgun sequencing in colorectal cancer, advanced colorectal lesions, and healthy human gut microbiota
Source: PubMed Central journal article supplement (PMC11285316; doi:10.1186/s12864-024-10621-7), 2024-07-29
Supplement: 12864_2024_10621_MOESM7_ESM.pdf [file 12864_2024_10621_MOESM7_ESM.pdf]

**Additional Figure 7** Importance of SVM binary models at the Species level (top-50). The agreement between 16S and shotgun in the Control vs HRL signatures is bounded between 16%-26%, 12%-26% in HRL vs CRC, and 22%-28% in Control vs CRC. Species common to 16S and shotgun signatures are highlighted in blue.

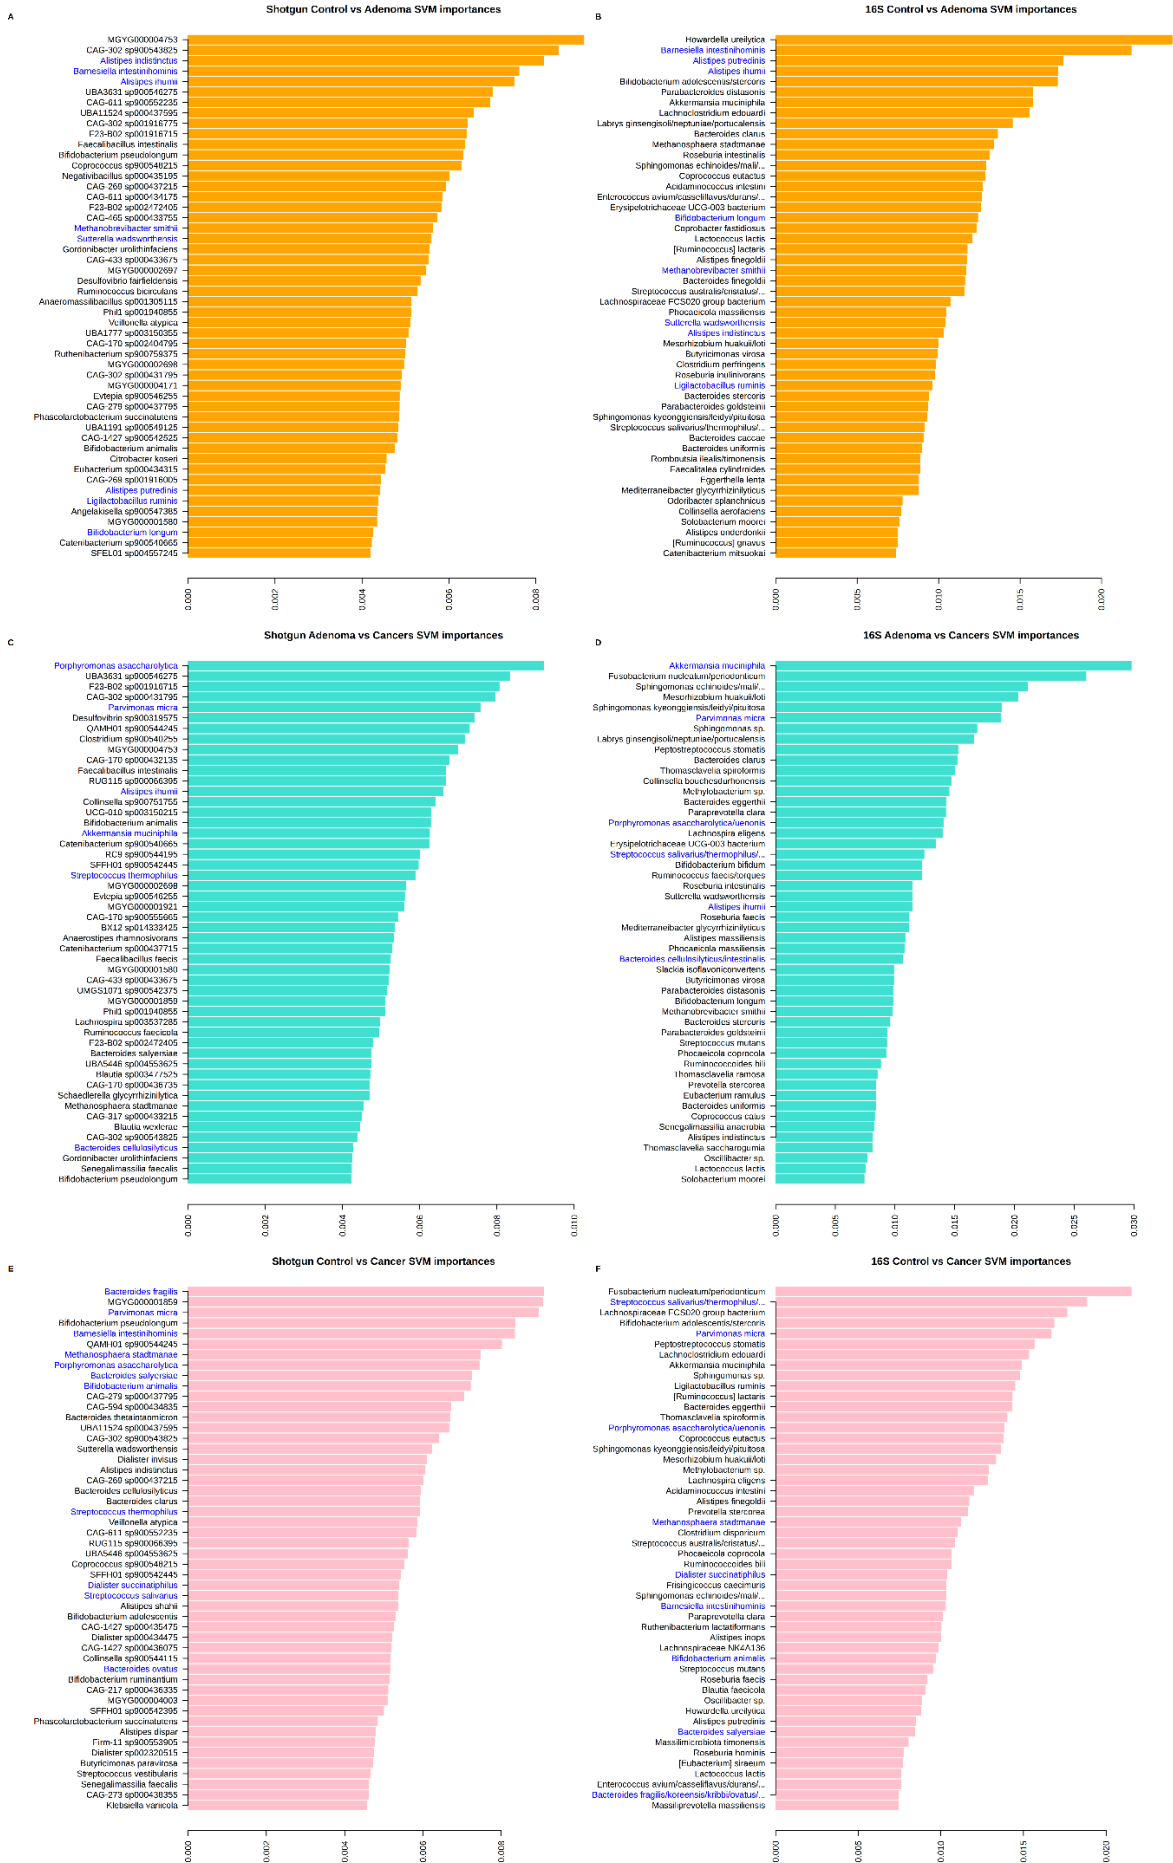

Note: Complete names of the 16S taxa that have been truncated in the plot:

- *Enterococcus*  
*avium/casseliflavus/durans/faecium/gallinarum/hermannienseis/hirae/hirae/phoeniculicola/raffinoseus/saccharolyticus/thailandicus*
- *Streptococcus salivarius/thermophilus/vestibularis*
- *Streptococcus*  
*australis/cristatus/gordonii/infantis/mitis/oralis/parasanguinis/pneumoniae/pseudopneumoniae/sanguinis*
- *Bacteroides fragilis/koreenseis/kribbi/ovatus/xylanisolvens*
- *Sphingomonas echinoides/mali/oligophenolica/sanxanigenens*
