# Supplementary material for: Comparison between 16S rRNA and shotgun sequencing in colorectal cancer, advanced colorectal lesions, and healthy human gut microbiota
Source: PubMed Central journal article supplement (PMC11285316; doi:10.1186/s12864-024-10621-7), 2024-07-29
Supplement: 12864_2024_10621_MOESM8_ESM.pdf [file 12864_2024_10621_MOESM8_ESM.pdf]

**Additional Table 1** Wilcoxon Rank Sum Tests' p-values comparing the alpha diversity distribution between 16S and shotgun, stratified by diagnostic status at the species, genus and family taxonomy levels.

| Wilcoxon<br>p-value | Species        |               | Genus          |               | Family         |               |
|---------------------|----------------|---------------|----------------|---------------|----------------|---------------|
|                     | <b>Shannon</b> | <b>Chao 1</b> | <b>Shannon</b> | <b>Chao 1</b> | <b>Shannon</b> | <b>Chao 1</b> |
| Negative            | < 2.2e-16      | < 2.2e-16     | 4.1e-15        | < 2.2e-16     | 0.020          | < 2.2e-16     |
| HRL                 | 5.6e-15        | < 2.2e-16     | 1.1e-11        | < 2.2e-16     | 0.020          | < 2.2e-16     |
| CRC                 | < 2.2e-16      | < 2.2e-16     | 3.3e-15        | < 2.2e-16     | 0.001          | < 2.2e-16     |
