# Supplementary material for: Comparison between 16S rRNA and shotgun sequencing in colorectal cancer, advanced colorectal lesions, and healthy human gut microbiota
Source: PubMed Central journal article supplement (PMC11285316; doi:10.1186/s12864-024-10621-7), 2024-07-29
Supplement: 12864_2024_10621_MOESM9_ESM.pdf [file 12864_2024_10621_MOESM9_ESM.pdf]

**Additional Table 2** Kruskal-Wallis p-value for the distribution of zeros (see **Figure 6**) in controls, HRL and CRC patients, before and after filtering.

| <b>Kruskal Wallis</b> | <b>Species</b> | <b>Genus</b> | <b>Family</b> |
|-----------------------|----------------|--------------|---------------|
| shotgun               | 0.044          | 0.029        | 0.15          |
| 16S                   | 0.77           | 0.88         | 0.61          |
| shotgun (Filtered)    | 0.014          | 0.006        | 0.25          |
| 16S (Filtered)        | 0.67           | 0.91         | 0.36          |
