# Supplementary material for: Comparison between 16S rRNA and shotgun sequencing in colorectal cancer, advanced colorectal lesions, and healthy human gut microbiota
Source: PubMed Central journal article supplement (PMC11285316; doi:10.1186/s12864-024-10621-7), 2024-07-29
Supplement: 12864_2024_10621_MOESM10_ESM.pdf [file 12864_2024_10621_MOESM10_ESM.pdf]

**Additional Table 3** PERMANOVA results and its post-hoc analysis. 9999 permutations. All the p-values are Benjamini-Hochberg adjusted p-values. C: control, HRL, CRC.

|                | <b>16S</b>              |                                                            | <b>Shotgun</b>          |                                                            |
|----------------|-------------------------|------------------------------------------------------------|-------------------------|------------------------------------------------------------|
|                | PERMANOVA               | Post-hoc                                                   | PERMANOVA               | Post-hoc                                                   |
| <b>Family</b>  | F=4.4,<br>p-value: 1e-4 | C vs HRL: 1.5e-4<br>C vs CRC: 3.1e-3<br>HRL vs CRC: 1.5e-4 | F=3.3,<br>p-value: 1e-4 | C vs HRL: 2.5e-3<br>C vs CRC: 4.5e-4<br>HRL vs CRC: 4.5e-4 |
| <b>Genus</b>   | F=2.8,<br>p-value: 1e-4 | C vs HRL: 1.5e-4<br>C vs CRC: 3.4e-3<br>HRL vs CRC: 1.5e-4 | F=2.7,<br>p-value: 2e-4 | C vs HRL: 6e-4<br>C vs CRC: 0.01<br>HRL vs CRC: 4e-4       |
| <b>Species</b> | F=4.4,<br>p-value: 1e-4 | C vs HRL: 1.5e-4<br>C vs CRC: 1.4e-3<br>HRL vs CRC: 1.5e-4 | F=2.2,<br>p-value: 1e-4 | C vs HRL: 1.4e-3<br>C vs CRC: 1.8e-3<br>HRL vs CRC: 1.4e-3 |
