# Supplementary material for: Comparison between 16S rRNA and shotgun sequencing in colorectal cancer, advanced colorectal lesions, and healthy human gut microbiota
Source: PubMed Central journal article supplement (PMC11285316; doi:10.1186/s12864-024-10621-7), 2024-07-29
Supplement: 12864_2024_10621_MOESM11_ESM.pdf [file 12864_2024_10621_MOESM11_ESM.pdf]

**Additional Table 4** Training and test agreement for the SVM binary models: proportion of agreement, Cohen’s kappa and Pearson *r* between the 16S and shotgun models output. Statistically significant Cohen’s kappa and Pearson *r* are highlighted in **bold**.

| Models  |                | Agreement |      | Kappa                              |                                     | Pearson <i>r</i>      |                                    |
|---------|----------------|-----------|------|------------------------------------|-------------------------------------|-----------------------|------------------------------------|
|         |                | Training  | Test | Training                           | Test                                | Training              | Test                               |
| Species | Control vs HRL | 0.71      | 0.60 | <b>0.43</b><br><b>(0.28, 0.59)</b> | 0.23<br>(-0.09, 0.55)               | 0.50<br>(0.36, 0.62)  | <b>0.40</b><br><b>(0.05, 0.67)</b> |
|         | Control vs CRC | 0.85      | 0.77 | <b>0.69</b><br><b>(0.56, 0.82)</b> | <b>0.47</b><br><b>(0.14, 0.80)</b>  | 0.79<br>(0.72, 0.85)  | <b>0.46</b><br><b>(0.12, 0.70)</b> |
|         | HRL vs CRC     | 0.72      | 0.67 | <b>0.38</b><br><b>(0.21, 0.55)</b> | 0.29<br>(-0.06, 0.63)               | 0.62<br>(0.50, 0.72)  | 0.19<br>(-0.18, 0.52)              |
| Genus   | Control vs HRL | 0.66      | 0.60 | <b>0.34</b><br><b>(0.19, 0.49)</b> | 0.23<br>(-0.09, 0.54)               | 0.46<br>(0.31, 0.59)  | <b>0.44</b><br><b>(0.09, 0.69)</b> |
|         | Control vs CRC | 0.75      | 0.77 | <b>0.45</b><br><b>(0.29, 0.61)</b> | 0.31<br>(-0.08, 0.71)               | 0.714<br>(0.62, 0.79) | <b>0.38</b><br><b>(0.03, 0.65)</b> |
|         | HRL vs CRC     | 0.71      | 0.73 | <b>0.34</b><br><b>(0.16, 0.51)</b> | <b>0.38</b><br><b>(0.04, 0.72)</b>  | 0.60<br>(0.47, 0.70)  | 0.23<br>(-0.14, 0.55)              |
| Family  | Control vs HRL | 0.67      | 0.67 | <b>0.34</b><br><b>(0.18, 0.50)</b> | <b>0.34</b><br><b>(0.003, 0.67)</b> | 0.38<br>(0.22, 0.52)  | <b>0.44</b><br><b>(0.09, 0.69)</b> |
|         | Control vs CRC | 0.75      | 0.77 | <b>0.38</b><br><b>(0.20, 0.55)</b> | 0.22<br>(-0.19, 0.64)               | 0.69<br>(0.59, 0.78)  | 0.25<br>(-0.12, 0.56)              |
|         | HRL vs CRC     | 0.67      | 0.70 | <b>0.24</b><br><b>(0.06, 0.41)</b> | 0.31<br>(-0.003, 0.62)              | 0.52<br>(0.38, 0.64)  | 0.13<br>(-0.24, 0.47)              |
