# Supplementary material for: Comparison between 16S rRNA and shotgun sequencing in colorectal cancer, advanced colorectal lesions, and healthy human gut microbiota
Source: PubMed Central journal article supplement (PMC11285316; doi:10.1186/s12864-024-10621-7), 2024-07-29
Supplement: 12864_2024_10621_MOESM12_ESM.pdf [file 12864_2024_10621_MOESM12_ESM.pdf]

**Additional Table 5** Agreement in Support Vectors between models (only Cohen's kappa is shown). p-values < 0.05 are in **bold**.

| Models  | SV vs No SV                         | p-value      | SV(alpha<C) vs<br>SV(alpha=C) vs No SV | p-value       |
|---------|-------------------------------------|--------------|----------------------------------------|---------------|
|         | 0.05<br>(-0.20, 0.30)               | 0.67         | 0.034 (-0.14, 0.21)                    | 0.71          |
| Species | Control vs HRL                      |              |                                        |               |
|         | 0.22<br>(-0.11, 0.55)               | 0.19         | <b>0.31 (0.14, 0.49)</b>               | <b>5e-4</b>   |
|         | HRL vs CRC                          | 0.54         | <b>0.18 (0.02, 0.35)</b>               | <b>0.028</b>  |
|         | 0.077<br>(-0.170, 0.32)             |              |                                        |               |
|         | Control vs HRL                      | 0.99         | -0.02 (-0.16, 0.12)                    | 0.79          |
|         | 0.001<br>(-0.203, 0.21)             |              |                                        |               |
| Genus   | Control vs CRC                      | <b>0.001</b> | <b>0.42 (0.23, 0.61)</b>               | <b>1e-5</b>   |
|         | <b>0.50</b><br><b>(0.203, 0.80)</b> |              |                                        |               |
|         | HRL vs CRC                          | 0.25         | <b>0.22 (0.059, 0.39)</b>              | <b>7.7e-3</b> |
|         | 0.15<br>(-0.10, 0.39)               |              |                                        |               |
|         | Control vs HRL                      | 0.28         | -0.047 (-0.19, 0.09)                   | 0.71          |
|         | -0.11<br>(-0.17, -0.04)             |              |                                        |               |
| Family  | Control vs CRC                      | 0.14         | <b>0.25 (0.079, 0.41)</b>              | <b>3.8e-3</b> |
|         | 0.20<br>(-0.063, 0.46)              |              |                                        |               |
|         | HRL vs CRC                          | <b>0.037</b> | <b>0.28 (0.12, 0.44)</b>               | <b>6.5e-3</b> |
|         | <b>0.24</b><br><b>(0.014, 0.47)</b> |              |                                        |               |
